# Supplementary figures and images for: Morphology, Loadability, and Releasing Profiles of CalliSpheres Microspheres in Delivering Oxaliplatin: An In Vitro Study
Source: PubMed Central journal article supplement — Technol Cancer Res Treat. 2019 Oct 20;18:1533033819877989. doi: 10.1177/1533033819877989 (PMC6801889; doi:10.1177/1533033819877989), 2019-10-20

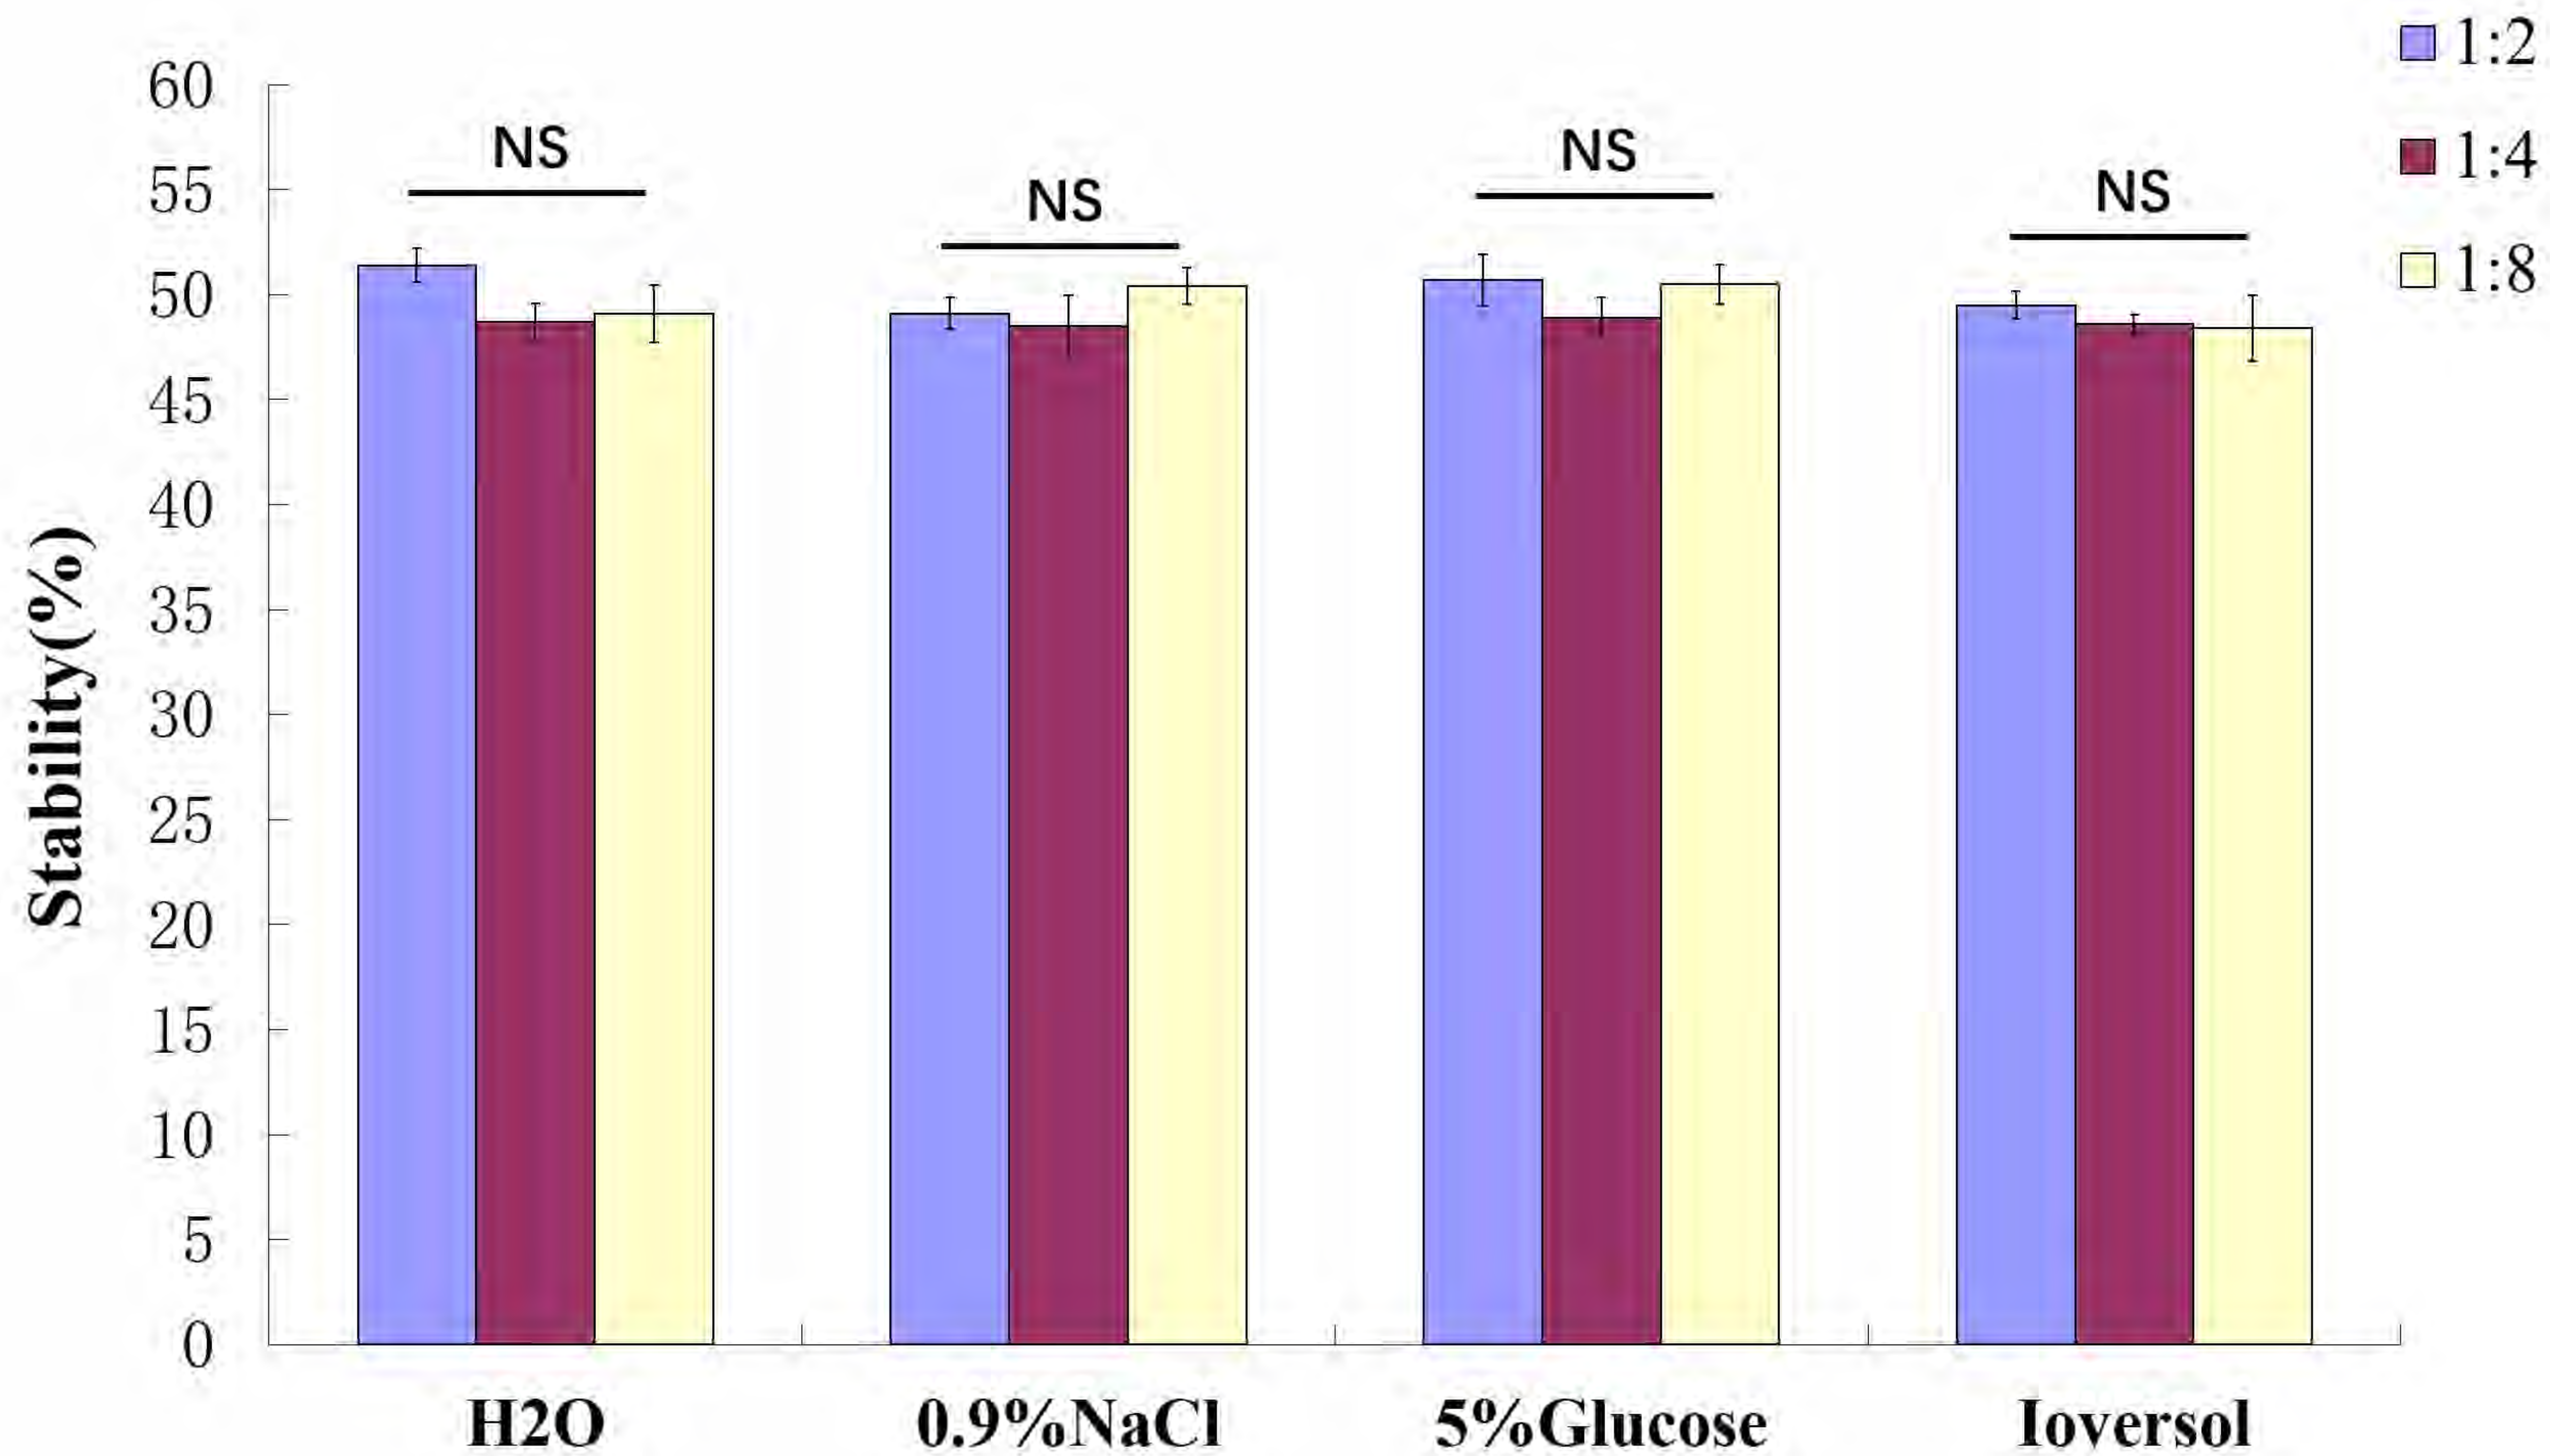

Supplement: Supplementary_Figure_1_(revised).pdf [file Supplementary_Figure_1_%28revised%29.pdf]
